# Supplementary material for: Determining the impact of vaccination on SARS-CoV-2 RT-PCR cycle threshold values and infectious viral titres
Source: PubMed Central journal article supplement (PMC10634488; doi:10.1099/acmi.0.000597.v3), 2023-10-20
Supplement: acmi-5-597.v3-s001.pdf [file acmi-5-597.v3-s001.pdf]

**Supplementary Table 1.** Sequencing data were deposited to the NCBI Sequence Read Archive under the BioProject PRJNA938406 with the following accession numbers.

| Collection Date | Deidentified ID                      | SRA Accession | BioSample Accession |
|-----------------|--------------------------------------|---------------|---------------------|
| 2021-08-26      | 969e16c9-541a-42b3-a217-651f0b524a73 | SRR23612258   | SAMN33434917        |
| 2021-08-25      | 399030d6-1020-4678-a086-2220a131f526 | SRR23612267   | SAMN33434909        |
| 2021-08-26      | de2aefa1-054e-473b-ba6c-22d0a75bc4e6 | SRR23612260   | SAMN33434915        |
| 2021-08-26      | 6ad4b475-ccb3-4139-9796-fafd5031d321 | SRR23612274   | SAMN33434903        |
| 2021-08-26      | 28bb72f2-8190-425d-8a3d-cf0ce5955f2d | SRR23612275   | SAMN33434902        |
| 2021-08-28      | 7f1713bd-1f14-4320-b14c-7d3ebff430a9 | SRR23612277   | SAMN33434900        |
| 2021-09-03      | 74097e26-3ce2-41ca-a4bf-67019265576f | SRR23612257   | SAMN33434918        |
| 2021-09-04      | 9800ec12-2d2c-40d2-916d-ccca7909a917 | SRR23612266   | SAMN33434910        |
| 2021-09-05      | a8e44555-78ff-44b1-a7f4-5c1e6385c6dc | SRR23612256   | SAMN33434919        |
| 2021-09-04      | a3896a3c-c013-4e30-8e3d-4d35010e5cd1 | SRR23612263   | SAMN33434913        |
| 2021-09-01      | 28b7d05b-4d75-430e-a2f2-e643a972c3f5 | SRR23612259   | SAMN33434916        |
| 2021-09-01      | 36bb4e9b-9776-4ce7-add7-3a50449c05f2 | SRR23612261   | SAMN33434914        |
| 2021-09-01      | 6526622d-46ba-49c7-b372-2af5c435e6da | SRR23612265   | SAMN33434911        |
| 2021-09-01      | c058757c-a0cf-423f-b103-df17959452cc | SRR23612255   | SAMN33434920        |
| 2021-08-05      | 3a01f632-57d9-479d-877b-35fae982eeeb | SRR23612264   | SAMN33434912        |
| 2021-08-07      | ec6f266d-6eef-471b-8049-57e49e4a3aa1 | SRR23612269   | SAMN33434907        |
| 2021-07-23      | 80a49d9a-eb64-46ea-98f2-33c025f979b0 | SRR23612272   | SAMN33434904        |
| 2021-07-24      | ea07e6a3-6f16-4e40-bb69-03ab9bf827f1 | SRR23612268   | SAMN33434908        |
| 2021-07-24      | c4832004-23c9-4e91-8320-4115452476a9 | SRR23612271   | SAMN33434905        |
| 2021-07-27      | f305c926-2cdb-4787-b2cf-599e11ae01a4 | SRR23612276   | SAMN33434901        |
| 2021-07-28      | e1127d69-2b62-4d7f-90e3-c4275ff594e9 | SRR23612270   | SAMN33434906        |
| 2021-07-31      | e9a50cd4-f64f-41db-8cee-24f09f7cde5f | SRR23612279   | SAMN33434898        |
| 2021-07-19      | 3ed7530f-8036-4ac3-b102-fc4166c7947a | SRR23612282   | SAMN33434895        |
| 2021-08-24      | 25cb41f4-c711-48cd-b923-8d0cd188b2d4 | SRR23612281   | SAMN33434896        |
| 2021-07-29      | b783ac1d-ba20-401d-a6a4-f2c571e34679 | SRR23612249   | SAMN33434893        |
| 2021-07-29      | 0cdf5423-39b3-46c3-b447-c8465c17b734 | SRR23612251   | SAMN33434891        |
| 2021-07-30      | cc0c5214-30bf-4bb6-8912-e8bc623d055a | SRR23612280   | SAMN33434897        |
| 2021-07-29      | 6350efbf-9d13-4320-8b07-82192de743e5 | SRR23612278   | SAMN33434899        |
| 2021-08-02      | bf05c0a7-dec7-4d20-a2a1-018bd72baa00 | SRR23612250   | SAMN33434892        |
| 2021-08-03      | ee588edf-9f7c-45ff-8701-03038c5e9300 | SRR23612283   | SAMN33434894        |
| 2021-08-02      | 4c571822-c062-4e60-83eb-b36e7dab509a | SRR23612262   | SAMN33434887        |
| 2021-08-02      | b3c1e65b-b06d-4717-b5e8-12d836193342 | SRR23612252   | SAMN33434890        |
| 2021-08-04      | 8c7d8414-84df-4489-80b7-584b8aafa6bd | SRR23612254   | SAMN33434888        |
| 2021-08-04      | 786808c8-92cc-470b-9211-e6ee57afba1c | SRR23612285   | SAMN33434884        |
| 2021-08-03      | 42e1b35b-5bab-43b0-a765-eb412a36a42c | SRR23612253   | SAMN33434889        |
| 2021-08-04      | ea784cf3-21c3-4a91-ba1f-4a641184927e | SRR23612284   | SAMN33434885        |
| 2021-08-03      | a537fc2d-b6ed-455c-85cb-a16a50d0302c | SRR23612273   | SAMN33434886        |
